# Supplementary material for: Modeling the integrated framework of complex water resources system considering economic development, ecological protection, and food production: A practical tool for water management
Source: Copernicus journal article supplement (doi:10.5194/hess-2020-461), 2020-10-08

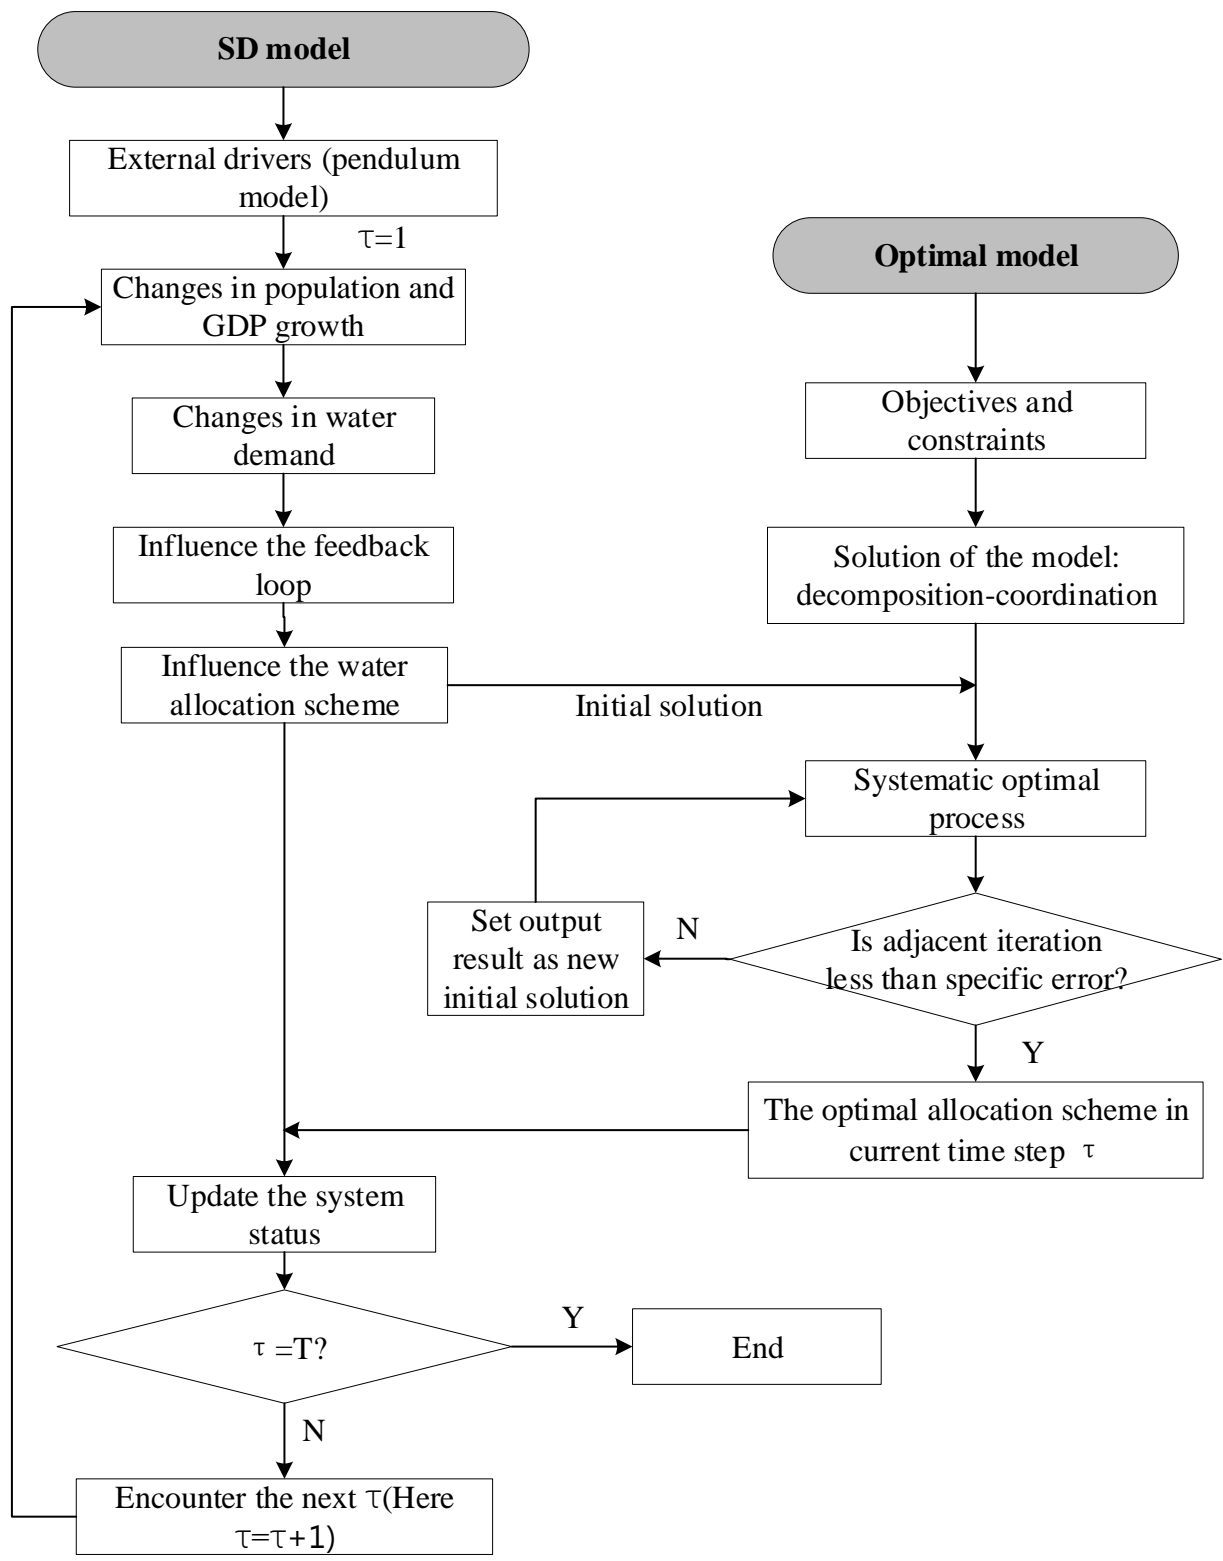

Supplement: Supplementary file [file hess-2020-461-AC2-supplement.pdf]
